# Supplementary material for: Oenothein B boosts antioxidant capacity and supports metabolic pathways that regulate antioxidant defense inCaenorhabditis elegans
Source: Royal Society of Chemistry journal article supplement (doi:10.1039/d0fo01635g), 2020-01-01
Supplement: d0fo01635g1.pdf [file d0fo01635g1.pdf]

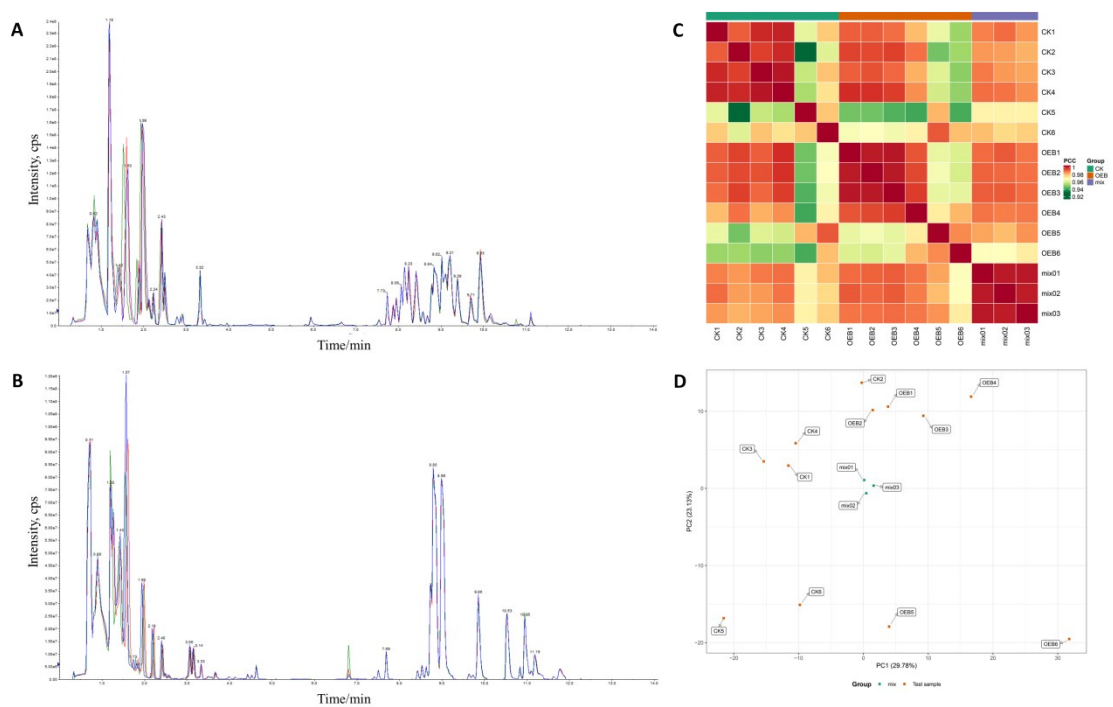

**Figure S1 Quality control of metabolomics between the control group and OEB treatment group.** The superposition of positive (A) and negative (B) total ions current graph; C, the biological repeatability assessment between samples in the observation groups; D, Score plots of principal components analysis for quality control and samples

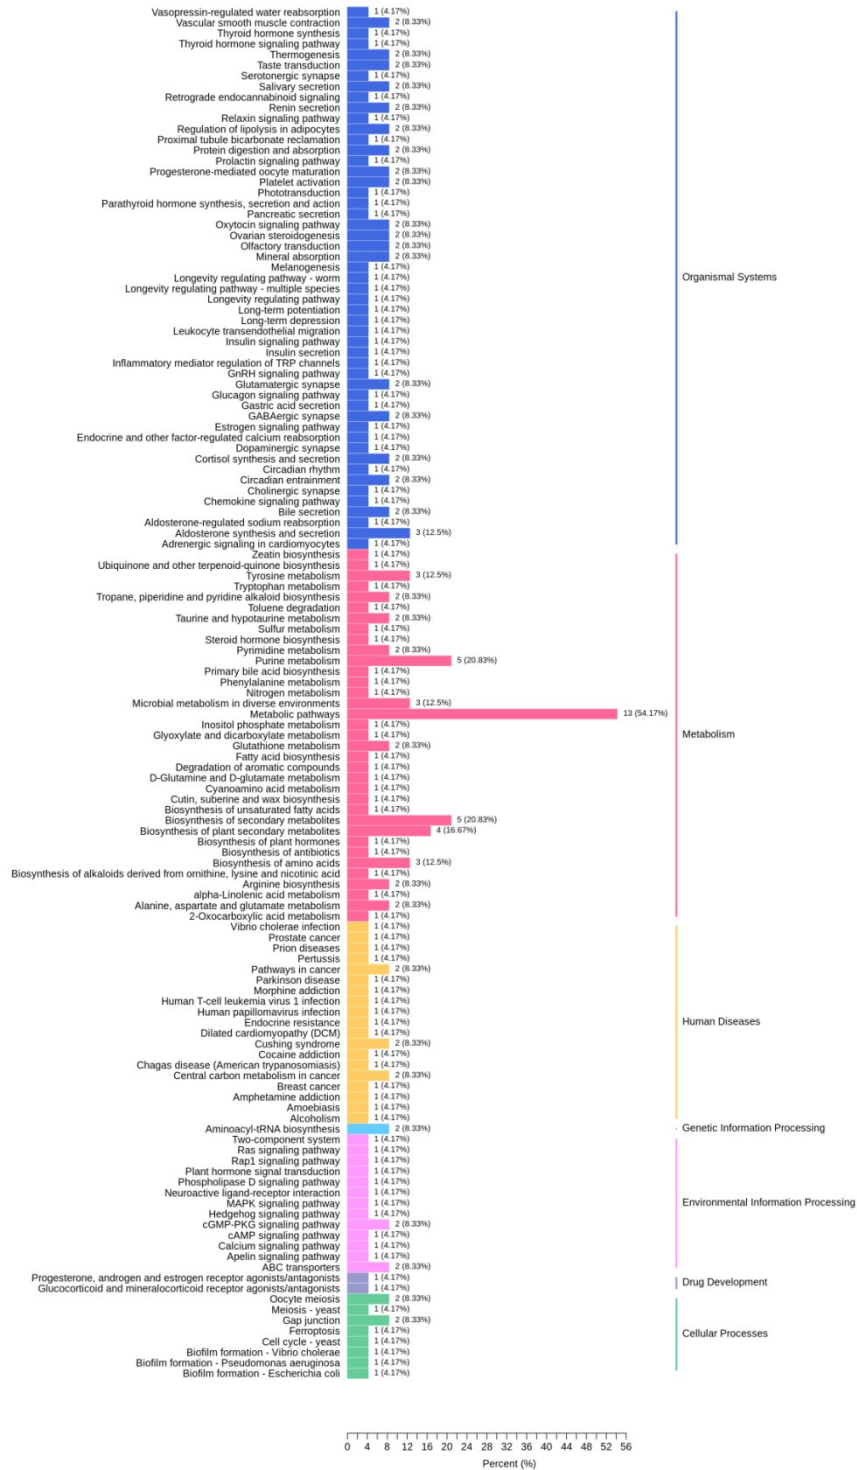

**Figure S2 Classification chart of KEGG pathways annotated with differential metabolites.** The ordinate is the name of the KEGG metabolic pathway. The abscissa is the number of annotated metabolites under the pathway, and the ratio of the number to the total number of annotated metabolites

**Table S1 Primer sequences of target genes**

| Gene (symbol)                   | Direction | Primer Sequence      | Accession number |
|---------------------------------|-----------|----------------------|------------------|
| <i>sod2</i>                     | Forward   | GCAGGGAACCATCCACTTCG | NM_013671.3      |
|                                 | Reverse   | CCTGCACTGGTACAGCCTTG |                  |
| <i>gpx1</i>                     | Forward   | GTCTCTCTGAGGCACCACGA | NM_001329527.1   |
|                                 | Reverse   | GCCATTCTGGTGTCCGAACT |                  |
| <i>cat</i>                      | Forward   | CTGGAGTCTTCGTCCCGAGT | NM_009804.2      |
|                                 | Reverse   | CATTCATGTGCCGGTGACCA |                  |
| <i><math>\beta</math>-actin</i> | Forward   | GCTGACAGGATGCAGAAGGA | NM_007393.5      |
|                                 | Reverse   | GTGGACAGTGAGGCCAGGAT |                  |

**Table S2 42 significantly differential metabolites**

| Compounds                            | Class                               | VIP  | Fold Change | Log <sub>2</sub> FC | Type |
|--------------------------------------|-------------------------------------|------|-------------|---------------------|------|
| (5-L-Glutamyl)-L-Amino Acid          | Amino acid metabolomics             | 1.63 | 2.12        | 1.08                | up   |
| L-Asparagine Anhydrous               | Amino acid metabolomics             | 1.38 | 2.83        | 1.50                | up   |
| L-Glutamine                          | Amino acid metabolomics             | 1.41 | 3.14        | 1.65                | up   |
| Γ-Glutamate-Cysteine                 | Amino acid metabolomics             | 1.43 | 2.14        | 1.10                | up   |
| 3-(4-Hydroxyphenyl)-Propionic Acid   | Benzene and substituted derivatives | 1.70 | 4.26        | 2.09                | up   |
| Adenine                              | Nucleotide metabolomics             | 1.38 | 4.94        | 2.30                | up   |
| DI-P-Hydroxyphenyllactic Acid        | Organic acid and its derivatives    | 1.68 | 2.55        | 1.35                | up   |
| L-3-Phenyllactic Acid                | Organic acid and its derivatives    | 1.71 | 4.26        | 2.09                | up   |
| Phenyllactate (Pla)                  | Organic acid and its derivatives    | 1.70 | 4.27        | 2.09                | up   |
| 2'-Deoxycytidine-5'-Monophosphate    | Nucleotide metabolomics             | 1.82 | 2.28        | 1.19                | up   |
| DI-3,4-Dihydroxymandelic Acid        | Organic acid and its derivatives    | 1.64 | 2.05        | 1.03                | up   |
| Hydroxyphenyllactic acid             | Carbohydrate metabolomics           | 1.68 | 2.56        | 1.36                | up   |
| N-lactoyl-phenylalanine              | Organic acid and its derivatives    | 1.44 | 2.05        | 1.03                | up   |
| C-glycosyltryptophan                 | Amino acid metabolomics             | 1.44 | 3.22        | 1.69                | up   |
| Methionine Sulfoxide                 | Amino acid metabolomics             | 1.67 | 9.02        | 3.17                | up   |
| N-Acetyl-L-Glutamic Acid             | Amino acid metabolomics             | 1.66 | 2.22        | 1.15                | up   |
| Guanosine 3',5'-Cyclic Monophosphate | Nucleotide metabolomics             | 1.83 | 2.75        | 1.46                | up   |
| Metanephrine                         | Hormones                            | 1.82 | 3.16        | 1.66                | up   |
| Progesterone                         | Hormones                            | 1.65 | 3.63        | 1.86                | up   |
| 1,3,7-Trimethyluric Acid             | Organic acid and its derivatives    | 1.04 | 2.01        | 1.01                | up   |
| Cyclic Amp                           | Nucleotide metabolomics             | 1.57 | 2.08        | 1.06                | up   |
| Isoxanthopterin                      | Pteridines and derivatives          | 1.92 | 9.72        | 3.28                | up   |
| 2-Aminoethanesulfonic Acid           | Organic acid and its derivatives    | 1.55 | 2.02        | 1.01                | up   |
| Oleamide                             | Lipids fatty acids                  | 1.65 | 2.18        | 1.12                | up   |
| Oleate                               | Lipids                              | 1.60 | 2.73        | 1.45                | up   |
| Guanidinoethyl Sulfonate             | Organic acid and its derivatives    | 1.54 | 2.01        | 1.01                | up   |
| Asp-Phe methyl ester                 | Organic acid and its derivatives    | 1.85 | 3.50        | 1.81                | up   |
| 1-(4-Methoxyphenyl)-2-propanone      | Benzene and substituted derivatives | 1.66 | 2.16        | 1.11                | up   |
| Methylcysteine                       | Amino acid metabolomics             | 1.68 | 2.89        | 1.53                | up   |
| 10-Undecenoic acid                   | Fatty acyls                         | 1.55 | 2.30        | 1.20                | up   |
| Nα-Acetyl-L-glutamine                | Amino acid metabolomics             | 1.77 | 2.01        | 1.01                | up   |
| L-Tryptophanamide                    | Amino acid metabolomics             | 1.71 | 2.21        | 1.14                | up   |
| Methoxyindoleacetic Acid             | Indole and is derivatives           | 1.64 | 0.32        | -1.65               | down |
| gamma-Muurolene                      | Lipids fatty acids                  | 1.01 | 0.37        | -1.43               | down |
| ADP-ribose                           | Nucleotide metabolomics             | 1.51 | 0.42        | -1.24               | down |
| DL-Benzylsuccinic acid               | Lipids fatty acids                  | 1.17 | 0.42        | -1.25               | down |
| N-Acetylvaline                       | Organic acid and its derivatives    | 1.24 | 0.39        | -1.34               | down |
| Scyllo inositol                      | Alcohol                             | 1.38 | 0.43        | -1.23               | down |
| Hexadecanamide                       | Lipids fatty acids                  | 1.23 | 0.28        | -1.85               | down |
| trans-3-Indoleacrylic acid           | Organic acid and its derivatives    | 1.34 | 0.34        | -1.56               | down |
| Petroselinic Acid                    | Lipids                              | 1.31 | 0.34        | -1.55               | down |
| Jasmonic acid                        | Lipids fatty acids                  | 1.33 | 0.34        | -1.57               | down |
